# Supplementary material
Source: PubMed Central journal article supplement (PMC5704470)
Supplement: 10.1074_M116.773713_jbc.M116.773713-1.pdf [file 10.1074_M116.773713_jbc.M116.773713-1.pdf]

**Supplementary Material for:**

Pleiotrophin, a multifunctional cytokine and growth factor, induces leukocyte responses through the integrin Mac-1

**Di Shen, Nataly P. Podolnikova, Valentin P. Yakubenko, Christopher L. Ardell, Arnat Balabiyev, Tatiana P. Ugarova and Xu Wang**

**Supplementary Figures**

Figure S1. PTN fragments inhibit adhesion of Mac-1-HEK293 cells to PTN in a dose-dependent manner.  
Figure S2. Densitometry analysis of Western blot images of Erk1/2 phosphorylation induced by PTN in Mac-1-HEK293 cells

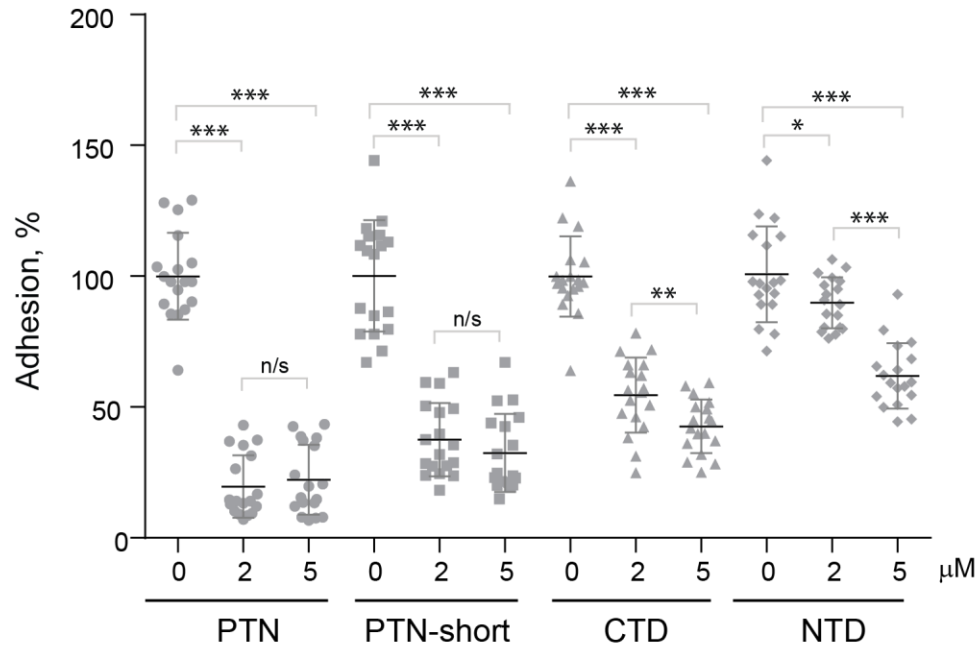

**FIGURE S1. PTN fragments inhibit adhesion of Mac-1-HEK293 cells to PTN in a dose-dependent manner.** The 96-wells 4HBX plates were coated with 100 nM of PTN and post-coated with 1% PVP. Different concentrations of PTN or PTN fragments were preincubated with cells for 20 min before loading into wells. The adhesion assay was performed as described in the Experimental Procedures. Adhesion in the absence of soluble PTN or PTN fragments was assigned a value of 100%. Data shown are means  $\pm$  S.E. from three separate experiments with sextuplicate measurements. \* $p \leq 0.05$ , \*\* $p \leq 0.001$  \*\*\* $p \leq 0.001$  compared with control adhesion in the absence of fragments.

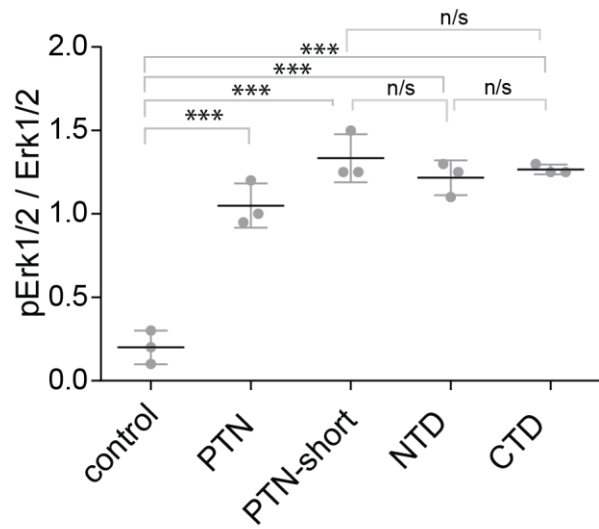

**FIGURE S2. Densitometry analysis of Western blot images of Erk1/2 phosphorylation induced by PTN in Mac-1-HEK293 cells.** Erk1/2 activation data are shown as a ratio of the intensity of the phosphorylated Erk1/2 (pErk1/2) band to the total (Erk1/2) band. The pErk/Erk ratio for the PTN-activated lane was set to 1.0. Data shown are means  $\pm$  S.E. from three separate experiments. \*\*\* $p \leq 0.001$ .
